# Supplementary material
Source: PubMed Central journal article supplement (PMC3361457)
Supplement: 1206062109_pnas.201206062SI.pdf [file 1206062109_pnas.201206062SI.pdf]

# Supporting Information

Xue et al. 10.1073/pnas.1206062109

## SI Materials and Methods

The following quantitative RT-PCR primers were used:

*mDlc1*: 5'-CCACTGATATCCCGAAAGA-3' and 5'-AAGC-TGTGCCACCTCAGTCT-3'  
*mFgl1*: 5'-GGAGGGGGATGGACTGTAAT-3' and 5'-GCC-AGTATTCGCCATTGTTT-3'  
*mVps37a*: 5'-TGCAAAGGCAACATGAACTC-3' and 5'-CGA-TTCTTCCTCAGCTTCGT-3'  
*mArhgef10*: 5'-GAGATGCCGACCAGCGATG-3' and 5'-TC-GTTGTAAACCGTCTCGATG-3'  
*mTnfrsf10b*: 5'-CGGGCAGATCACTACACCC-3' and 5'-TG-TTACTGGAACAAAGACAGCC-3'

*mFbxo25*: 5'-AAGGTGTGACCCCTGTAGC-3' and 5'-CCTC-TTTTTGGCTGCGTATTCA-3'  
*mScara5*: 5'-CATGGATTTTACAATGATTCGCC-3' and 5'-TCCCCGTCCTTCTTGTCCT-3'  
*mBnip3l*: 5'-ATGTCTCACTTAGTCGAGCCG-3' and 5'-CTC-ATGCTGTGCATCCAGGA-3'  
*mTrim35*: 5'-TTCCGGGCCAAGTGTAAGAAC-3' and 5'-CC-AAGTCGTTTGACCTCA-3'  
*mGapdh*: 5'-GGTGAAGGTCGGTGTGAACG-3' and 5'-CTC-GTCCTGGAAGATGGTG-3'  
*mActin*: 5'-CCACCGATCCACACAGAGTA-3' and 5'-GGC-TCCTAGCACCATGAAGA-3'

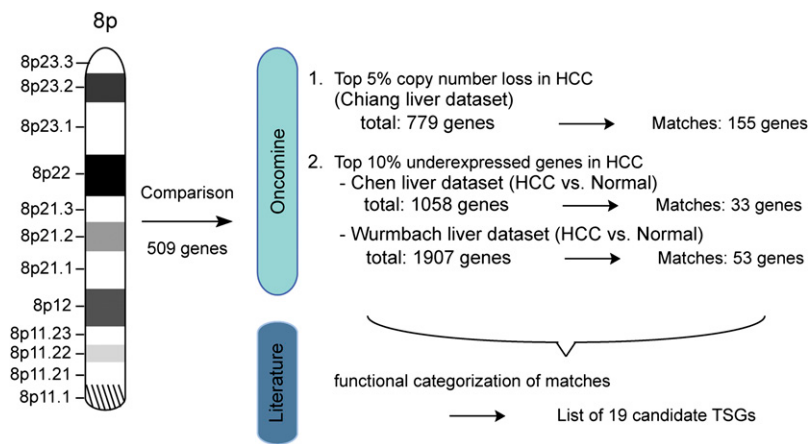

**Fig. S1.** Selection criteria for chromosome 8p candidate tumor-suppressor genes (TSGs). A complete list of genes and chromosome locations is provided in Table S1.



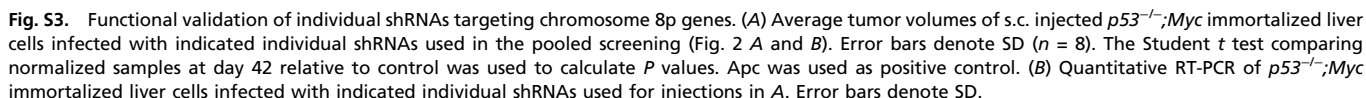

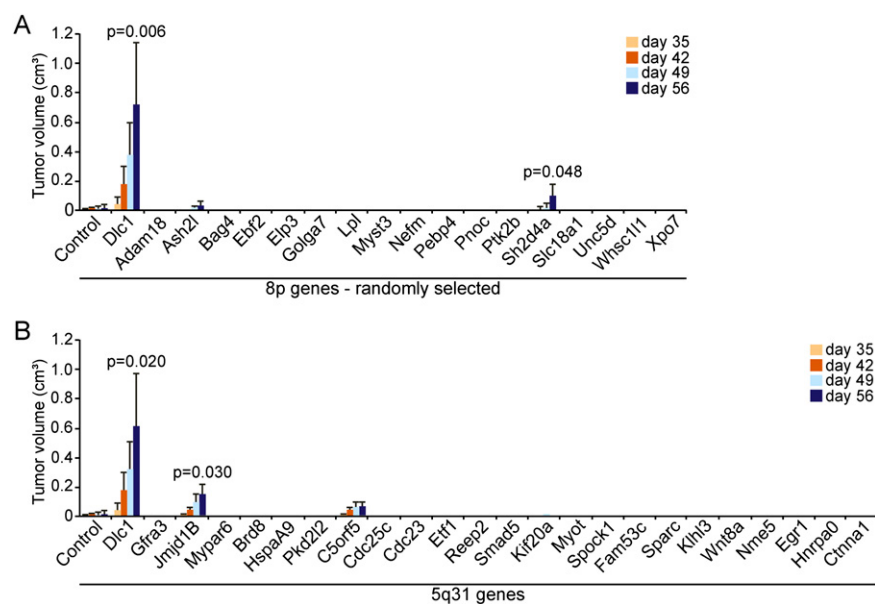

**Fig. S4.** Control in vivo RNAi screen for randomly selected 8p genes and 5q31 genes. (A-B) Average tumor volumes of s.c. injected *p53*<sup>-/-</sup>/*Myc* immortalized liver cells infected with shRNA pools targeting indicated 8p genes or 5q31 genes, respectively. Error bars denote SD (*n* = 4). The Student *t* test comparing normalized samples at day 56 relative to control was used for statistical calculations.

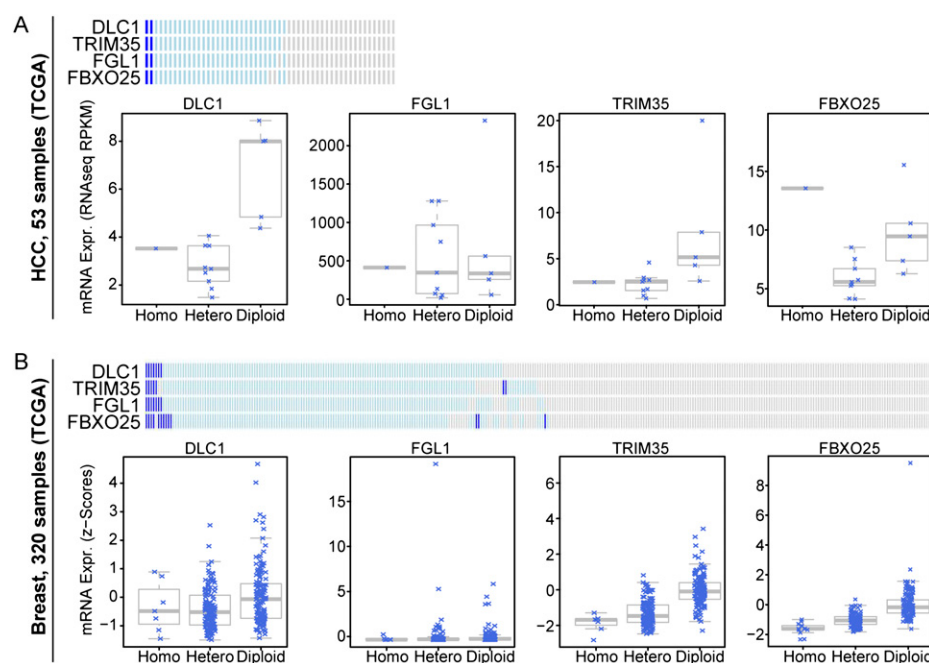

**Fig. S5.** Comparison of copy number loss to gene expression. (A and B, Upper) Putative copy number events based on the gene expression compared with copy number (GISTIC) algorithm for *DLC1*, *TRIM35*, *FGL1*, and *FBXO25* in each individual sample, with dark blue indicating homozygous loss and light blue indicating heterozygous loss. Of note, "homozygous" samples also can be tetraploid tumors with only a single remaining 8p arm. (A and B, Lower) GISTIC algorithm for the indicated genes for HCC (A) and invasive breast cancer (B). Data analysis is based on available TCGA data processed by the MSKCC cBio Core ([www.cbioportal.org](http://www.cbioportal.org)).

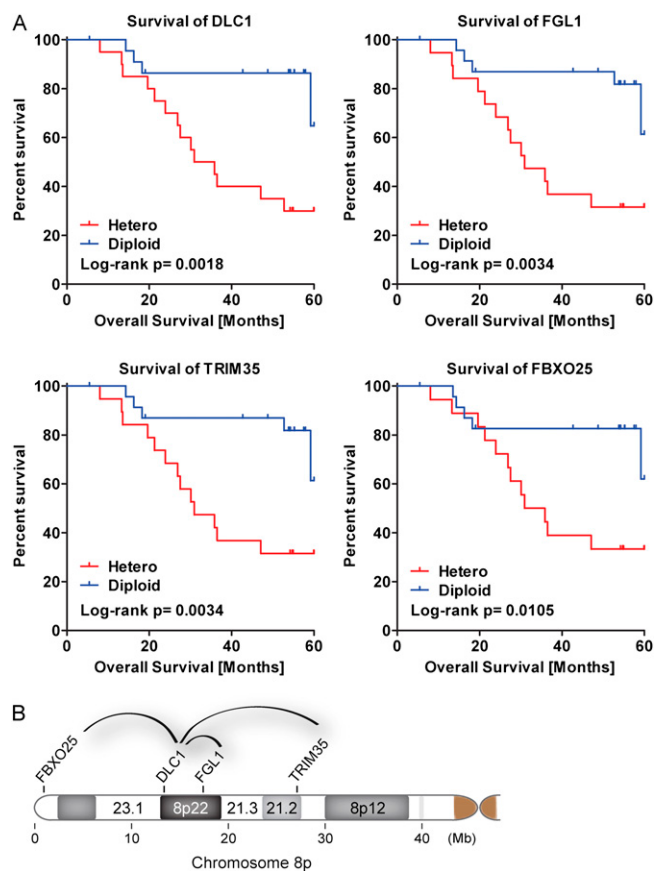

**Fig. S6.** Survival association of copy number loss of *DLC1*, *TRIM35*, *FGL1*, and *FBXO25* in HCC patients. (A) Survival curves of HCC patients comparing copy number (diploid vs. heterozygous loss) for the indicated individual chromosome 8p TSGs. Statistical tests were performed as described previously (1). (B) Schematic illustration of the chromosome position of the validated HCC TSGs showing cooperativity with *DLC1*.

1. Roessler S, et al. (2010) A unique metastasis gene signature enables prediction of tumor relapse in early-stage hepatocellular carcinoma patients. *Cancer Res* 70:10202–10212.

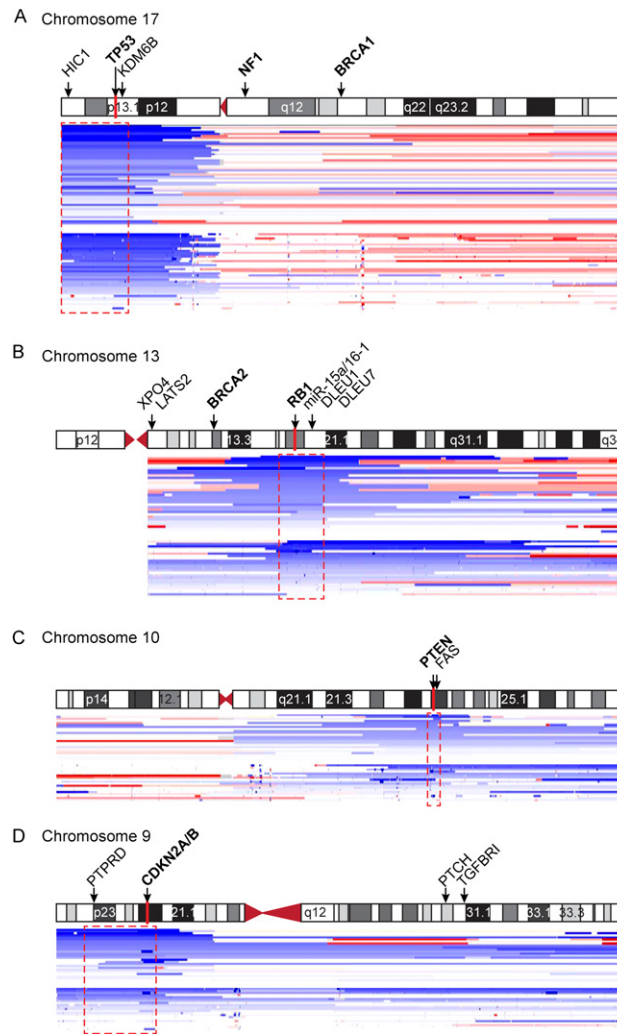

**Fig. S7.** Deletions at established TSG loci often include multiple candidate TSGs. Schematic diagrams of human chromosomes 17 (A), 13 (B), 10 (C), and 9 (D), with deletions indicated in blue and amplifications indicated in red from individual HCCs (based on 140 samples) as in Fig. 1A. The location of the most well-established TSG on each chromosome (*TP53*, *RB1*, *PTEN*, and *CDKN2A/B*) is indicated as a red line on the chromosome, with other established or candidate TSGs labeled in black. The red box highlights the most commonly deleted region.

**Table S1. Gene name, chromosome location, and deletion frequency of selected 8p candidate TSGs outside 8p22**

|          | Gene symbol      | Cytoband     | Description                                            | Start no. | Stop no. | Deletion frequency, % |
|----------|------------------|--------------|--------------------------------------------------------|-----------|----------|-----------------------|
| 8p23     | <i>FBXO25</i>    | 8p23.3       | F-box protein 25                                       | 356808    | 419876   | 44.02                 |
|          | <i>ERICH1</i>    | 8p23.3       | Glutamate-rich 1                                       | 614200    | 681226   | 43.54                 |
|          | <i>ARHGEF10</i>  | 8p23         | Rho guanine nucleotide exchange factor 10              | 1772149   | 1906807  | 41.15                 |
|          | <i>CSMD1</i>     | 8p23.2       | CUB and Sushi multiple domains 1                       | 2792875   | 4852328  | 41.63                 |
|          | <i>MCPH1</i>     | 8            | Microcephalin 1                                        | 6264121   | 6506026  | 41.63                 |
|          | <i>ANGPT2</i>    | 8p23.1       | Angiopoietin 2                                         | 6357172   | 6420784  | 41.63                 |
|          | <i>PINX1</i>     | 8p23         | PIN2-interacting protein 1                             | 10622884  | 10697299 | 42.11                 |
| 8p21-p11 | <i>LZT51</i>     | 8p22         | Leucine zipper, putative tumor suppressor 1            | 20103676  | 20112803 | 41.63                 |
|          | <i>BIN3</i>      | 8            | Bridging integrator 3                                  | 22477931  | 22526661 | 44.02                 |
|          | <i>TNFRSF10B</i> | 8p22-p21     | Tumor necrosis factor receptor superfamily, member 10b | 22877646  | 22926700 | 47.37                 |
|          | <i>LOXL2</i>     | 8p21.3-p21.2 | Lysyl oxidase-like 2                                   | 23154410  | 23261722 | 46.41                 |
|          | <i>BNIP3L</i>    | 8p21         | BCL2/adenovirus E1B 19kDa interacting protein 3-like   | 26240523  | 26270644 | 44.02                 |
|          | <i>TRIM35</i>    | 8            | Tripartite motif-containing 35                         | 27142404  | 27168834 | 49.28                 |
|          | <i>CLU</i>       | 8p21-p12     | Clusterin                                              | 27454451  | 27472327 | 47.85                 |
|          | <i>CCDC25</i>    | 8            | Coiled-coil domain containing 25                       | 27590833  | 27630170 | 46.41                 |
|          | <i>SCARA5</i>    | 8            | Scavenger receptor class A, member 5 (putative)        | 27727736  | 27850198 | 46.41                 |
|          | <i>DUSP4</i>     | 8p12-p11     | Dual specificity phosphatase 4                         | 29193611  | 29208185 | 44.02                 |
|          | <i>NRG1</i>      | 8            | Neuregulin 1                                           | 31497268  | 32622073 | 36.36                 |
|          | <i>SFRP1</i>     | 8p12-p11.1   | Secreted frizzled-related protein 1                    | 41119478  | 41166980 | 32.06                 |

Selection criteria are shown in Fig. S1. *DOK2*, a recently reported 8p lung TSG (1), is not strongly underexpressed in HCC and thus is not included in the list of candidate TSGs (Fig. S1).

1. Berger AH, et al. (2010) Identification of DOK genes as lung tumor suppressors. *Nat Genet* 42:216–223.

**Table S2. Overview of the results from the pooled screening for 8p23 and 8p21-11 TSGs listed as fold increase compared with the experimental control**

|          | Gene             | Fold increase compared<br>with control* | SEM (n = 6) | P value<br>(t test) | Penetration (no. of tumors/<br>no. of injection sites) |
|----------|------------------|-----------------------------------------|-------------|---------------------|--------------------------------------------------------|
| 8p23     | <i>Fbox25</i>    | 25.15                                   | ±6.00       | 0.220               | 6/6                                                    |
|          | <i>Erich1</i>    | 2.63                                    | ±1.91       | 0.420               | 2/6                                                    |
|          | <i>Arhgef10</i>  | 28.9                                    | ±5.10       | 0.047               | 5/6                                                    |
|          | <i>Csmd1</i>     | 7.36                                    | ±3.03       | 0.110               | 3/6                                                    |
|          | <i>Mcph1</i>     | 1.08                                    | ±0.55       | 0.890               | 2/6                                                    |
|          | <i>Angpt2</i>    | 10.61                                   | ±3.72       | 0.210               | 6/6                                                    |
|          | <i>Pinx1</i>     | 8.0                                     | ±2.80       | 0.120               | 4/6                                                    |
| 8p21-p11 | <i>Lzts1</i>     | 3.89                                    | ±1.99       | 0.220               | 2/6                                                    |
|          | <i>Bin3</i>      | 9.90                                    | ±3.38       | 0.042               | 3/6                                                    |
|          | <i>Tnfrsf10b</i> | 11.6                                    | ±3.30       | 0.140               | 4/6                                                    |
|          | <i>Loxl2</i>     | 13.0                                    | ±4.90       | 0.160               | 2/6                                                    |
|          | <i>Bnip3l</i>    | 14.02                                   | ±3.10       | 0.036               | 6/6                                                    |
|          | <i>Trim35</i>    | 9.83                                    | ±2.23       | 0.013               | 6/6                                                    |
|          | <i>Clu</i>       | 0.82                                    | ±0.76       | 0.150               | 1/6                                                    |
|          | <i>Ccdc25</i>    | 1.28                                    | ±1.04       | 0.720               | 6/6                                                    |
|          | <i>Scasra5</i>   | 8.3                                     | ±2.40       | 0.043               | 4/6                                                    |
|          | <i>Dusp4</i>     | 0.4                                     | ±0.70       | 0.360               | 1/6                                                    |
|          | <i>Nrg1</i>      | 2.4                                     | ±1.30       | 0.230               | 4/6                                                    |
|          | <i>Sfrp1</i>     | 0.77                                    | ±1.24       | 0.840               | 1/6                                                    |

\*Fold increase was calculated to the corresponding experimental shControl on day 49 for *Bnip3l* and on day 42 for *Trim35*.

| Gene             | COSMIC*                                                                                                     | HGMD <sup>†</sup>                                                      | Literature                                                                                                                                                     |
|------------------|-------------------------------------------------------------------------------------------------------------|------------------------------------------------------------------------|----------------------------------------------------------------------------------------------------------------------------------------------------------------|
| <i>ARHGEF10</i>  | Colon: 1/33; S28L (missense)                                                                                |                                                                        |                                                                                                                                                                |
| <i>BNIP3L</i>    | 0/181                                                                                                       |                                                                        | Ovarian cancer, 1/40 [Lai et al. (1)]                                                                                                                          |
| <i>DLC1</i>      | Kidney: 1/101; R347* (nonsense)<br>Lung: 1/12; K237N, R1294C (missense)<br>Pancreas: 1/2; R1425Q (missense) |                                                                        | HCC, ovarian, colorectal, and prostate<br>[Wilson et al. (2); Park et al. (3);<br>Liao et al. (4)]                                                             |
| <i>FBXO25</i>    | Ovarian: 1/1; A347D (missense)                                                                              |                                                                        |                                                                                                                                                                |
| <i>FGL1</i>      | 0/44                                                                                                        |                                                                        |                                                                                                                                                                |
| <i>TNFRSF10B</i> | 0/605                                                                                                       | Squamous cell carcinoma, head and<br>neck (insertion) [Pai et al. (5)] | Colorectal, truncating mutation<br>[Macartney-Coxson et al. (6)]; nonsmall<br>cell lung cancer [Lee et al. (7)]; metastatic<br>breast cancer [Shin et al. (8)] |
| <i>TRIM35</i>    | 0/180                                                                                                       |                                                                        |                                                                                                                                                                |
| <i>SCARA5</i>    | Melanoma: 1/1; E270K (missense)                                                                             |                                                                        |                                                                                                                                                                |
| <i>VPS37A</i>    | 0/44                                                                                                        |                                                                        |                                                                                                                                                                |

\*[www.sanger.ac.uk/genetics/CGP/cosmic/](http://www.sanger.ac.uk/genetics/CGP/cosmic/).

<sup>†</sup>[www.hgmd.cf.ac.uk/ac/index.php](http://www.hgmd.cf.ac.uk/ac/index.php).

1. Lai J, et al. (2003) Analysis of the candidate 8p21 tumour suppressor, BNIP3L, in breast and ovarian cancer. *Br J Cancer* 88:270–276.
2. Wilson PJ, et al. (2000) Sequence variants of DLC1 in colorectal and ovarian tumours. *Hum Mutat* 15:156–165.
3. Park SW, et al. (2003) DNA variants of DLC-1, a candidate tumor suppressor gene in human hepatocellular carcinoma. *Int J Oncol* 23:133–137.
4. Liao YC, et al. (2008) Mutations in the focal adhesion targeting region of deleted in liver cancer-1 attenuate their expression and function. *Cancer Res* 68:7718–7722.
5. Pai SJ, et al. (1998) Rare loss-of-function mutation of a death receptor gene in head and neck cancer. *Cancer Res* 58:3513–3518.
6. Macartney-Coxson DP, et al. (2008) Metastatic susceptibility locus, an 8p hot-spot for tumour progression disrupted in colorectal liver metastases: 13 candidate genes examined at the DNA, mRNA and protein level. *BMC Cancer* 8:187.
7. Lee SH, et al. (1999) Alterations of the DR5/TRAIL receptor 2 gene in non-small cell lung cancers. *Cancer Res* 59:5683–5686.
8. Shin MS, et al. (2001) Mutations of tumor necrosis factor-related apoptosis-inducing ligand receptor 1 (TRAIL-R1) and receptor 2 (TRAIL-R2) genes in metastatic breast cancers. *Cancer Res* 61:4942–4946.
